# Supplementary material
Source: publisher site journal article supplement (https://www.dovepress.com/get_supplementary_file.php?f=268402.docx)

FIGURE S1| Comparison of blood glucose in control, DN-no carcinoma and DN-carcinoma group. Data was calculated as mean± SE in μmol/L. ***p* < 0.001 VS control group.


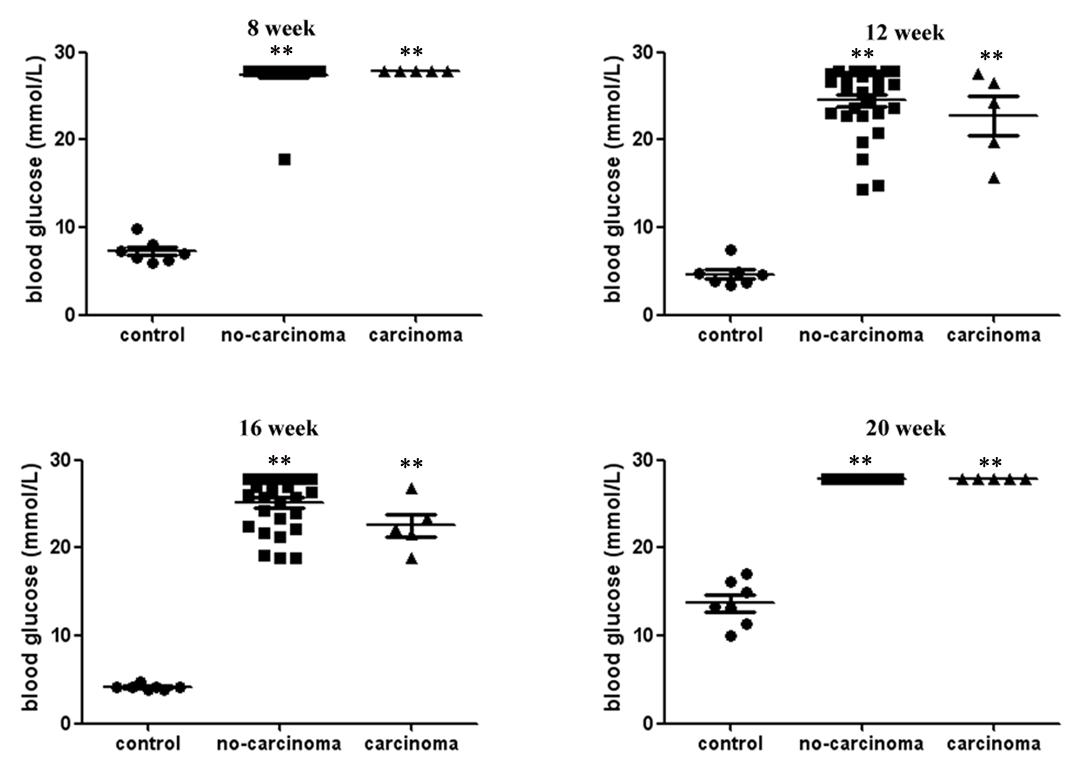

Supplement: Supplementary file 1 [file get_supplementary_file.php]
